# Supplementary material for: Full rescue of an inactive olfactory receptor mutant by elimination of an allosteric ligand-gating site
Source: PubMed Central journal article supplement (PMC6018111; doi:10.1038/s41598-018-27790-7), 2018-06-25
Supplement: 41598_2018_27790_MOESM1_ESM.pdf [file 41598_2018_27790_MOESM1_ESM.pdf]

**Full rescue of an inactive olfactory receptor mutant by elimination of an allosteric ligand-gating site**

Kanika Sharma<sup>1</sup>, Sabine Balfanz<sup>2\*</sup>, Arnd Baumann<sup>2</sup>, Sigrun Korsching<sup>1</sup>

<sup>1</sup> Institute of Genetics, Biocenter, University at Cologne, Zùlpicherstrasse 47a, 50674 Cologne, Germany

<sup>2</sup> Institute of Complex Systems (ICS-4), Research Center Jùlich, 52428 Jùlich, Germany

key words: cadaverine, gating, GPCR, site-directed mutagenesis, modeling, docking, calcium imaging

Table of contents:

Supplementary Table 1 EC50 for cadaverine and putrescine for mutant and wildtype TAAR13c ..... 3

Supplementary Table 1 Interacting residues within the external niche and internal binding-and-activation site ..... 3

Supplementary Figure 1 Cavity of the external niche in mutant D279R is narrower than in wildtype TAAR13c due to the bulky side chain of arginine ..... 4

Supplementary Figure 2 Extracellular molecular surfaces of TAAR13c showing potential entry channels ..... 5

**Supplementary Table 1 EC50 for cadaverine and putrescine for mutant and wildtype TAAR13c**

| Wildtype/Mutant            | EC50 ( $\mu\text{M}$ , mean $\pm$ SEM) |            |
|----------------------------|----------------------------------------|------------|
|                            | cadaverine                             | putrescine |
| TAAR13c wt for D112E/D279N | 35.6 $\pm$ 8.9                         | >1000      |
| D112E/D279N                | 58.8 $\pm$ 6.1                         | >1000      |
| TAAR13c wt for D279R       | 78.0 $\pm$ 12.0                        | >1000      |
| D279R                      | 15.1 $\pm$ 3.9                         | >100       |

**Supplementary Table 2 Interacting residues within the external niche and internal binding-and-activation site**

Amino acid residues predicted by docking to interact with cadaverine. Mutant TAAR13c is indicated by the amino acid exchange, e.g. D279R, D112E/D279N

| <i>Wildtype/<br/>Mutant</i> | <i>Interacting Residues</i>                                |                                          |
|-----------------------------|------------------------------------------------------------|------------------------------------------|
|                             | <i>External niche</i>                                      | <i>Internal binding site</i>             |
| TAAR13c                     | E175, Y193, F194, N195, A196, S199, D279, P280, Y288, F291 | D112, L113, T116, D202, T203, F272       |
| D279R                       | E175, Y193, F194, N195, A196, S199, R279, P280, N283       | D112, L113, T116, D202, T203, T206, F272 |
| D112E/D279N                 | E175, L192, Y193, F194, N195, A196, S199, N279, P280, N283 | L113, T116, D202, T203, T206, W269, F273 |

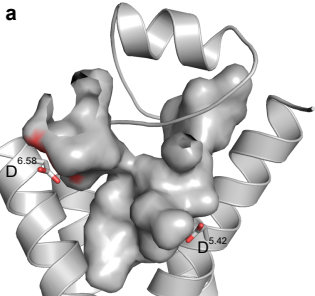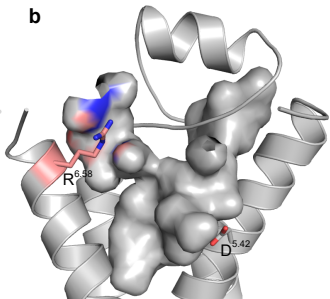

**Supplementary Figure 1 Cavity of the external niche in mutant D279R is narrower than in wildtype TAAR13c due to the bulky side chain of arginine.**

(a) Gating residue D279 (position 6.58) lining the cavity of the external niche. (b) Gating-site mutated to arginine, D279R (position 6.58) (salmon) with a bulky side chain narrows the cavity and possibly limits cadaverine exploration time in the external niche.



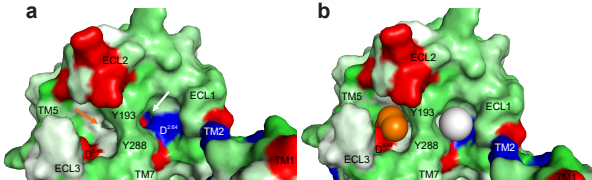

**Supplementary Figure 2 Extracellular molecular surfaces of TAAR13c showing potential entry channels**

Surface view from the extracellular surface; red, acidic residues; blue, basic residues; green, polar residues; white, hydrophobic residues. (a) Arrows pointing to openings in TAAR13c towards internal binding site. Negatively charged D<sup>6.58</sup> lining the left route along with electronegative environment of ECL2 is favorable for attracting cadaverine. (b) The accessible tunnels generated by MOLE 2.0 in orange and white.
